# Supplementary material for: Progression to microalbuminuria in type 1 diabetes: development and validation of a prediction rule
Source: PubMed Central journal article supplement — Diabetologia. 2009 Nov 4;53(2):254–62. doi: 10.1007/s00125-009-1585-3 (PMC2797626; doi:10.1007/s00125-009-1585-3), 2009-11-04
Supplement: 125_2009_1585_MOESM1_ESM.pdf [file 125_2009_1585_MOESM1_ESM.pdf]

## **Electronic supplementary material**

### **The EURODIAB Prospective Complications Study Group**

B. Karamanos, A. Kofinis, K. Petrou (Hippokration Hospital, Athens, Greece); F. Giorgino, G. Picca, A. Angarano, G. de Pergola, L. Laviola, R. Giorgino (Internal Medicine, Endocrinology and Metabolic Diseases, Department of Emergency and Organ Transplantation, University of Bari, Bari, Italy); C. Ionescu-Tirgoviste, A. Coszma, C. Guja (Clinic of Diabetes, Nutrition and Metabolic Diseases, Bucharest, Romania); M. Songini, A. Casu, M. Pedron, S. Pintus, M. Fossarello (Diabetes Unit Ospedale San Michele, Cagliari, Italy); J. B. Ferriss, G. Grealy, D. O'Keefe (Cork University Hospital, Cork, Ireland); M. Toeller, C. Arden (Diabetes Research Institute, Heinrich-Heine University, Duesseldorf, Germany); R. Rottiers, C. Tuytens, H. Priem (University Hospital of Gent, Gent, Belgium); P. Ebeling, M. Kylliäinen, V. A. Koivisto (University Hospital of Helsinki, Helsinki, Finland); B. Idzior-Walus, J. Sieradzki, K. Cyganek, B. Solnica (Department of Metabolic Diseases, Jagiellonian University, Krakow, Poland); H. H. P. J. Lemkes, J. C. Lemkes-Stuffken (Leiden University Medical Centre, Leiden, the Netherlands); J. Nunes-Correa, M. C. Rogado, L. Gardete-Correia, M. C. Cardoso, A. Silva, J. Boavida, M. Machado Sa Marques (Portuguese Diabetic Association, Lisbon, Portugal); G. Michel, R. Wirion, S. Cardillo (Centre Hospitalier, Luxembourg); G. Pozza, R. Mangili, V. Asnagli (Ospedale San Raffaele, Milan, Italy); E. Standl, B. Schaffler, H. Brand, A. Harms (City Hospital Schwabing, Munich, Germany); D. Ben Soussan, O. Verier-Mine, P. Fallas, M. C. Fallas (Centre Hospitalier de Valenciennes, Valenciennes, France); J. H. Fuller, J. Holloway, L. Asbury, D. J. Betteridge (University College London, London, UK); G. Cathelineau, A. Bouallouche, B. Villatte Cathelineau (Hospital Saint-Louis, Paris, France); F. Santeusano, G. Rosi, V. D'Alessandro, C. Cagini, P. Bottini, G. P. Reboldi (Dipartimento di Medicina Interna, Perugia, Italy); R. Navalesi, G. Penno, S. Bandinelli, R. Miccoli, M. Nannipieri (Dipartimento di Endocrinologia e Metabolismo, Pisa, Italy); G. Ghirlanda, C. Saponara, P. Cotroneo, A. Manto, A. Minnella (Universita Cattolica del Sacro Cuore, Rome, Italy); J. D. Ward, S. Tesfaye, S. Eaton, C. Mody (Royal Hallamshire Hospital, Sheffield, UK); M. Borra, P. Cavallo Perin, S. Giunti, G. Grassi, G. F. Pagano, M. Porta, R. Sivieri, F. Vitelli, M. Veglio (Dipartimento di Medicina Interna, Università di Torino and ASO CTO/CRF/Maria Adelaide, Turin, Italy); N. Papazoglou, G. Manes (General Hospital Papageorgiou, Diabetes Unit, Thessaloniki, Greece); M. Muggeo, M. Iagulli, V. Cacciatori (V. Cattedra di Malattie del Metabolismo, Verona, Italy); K. Irsigler, H. Abrahamian

(Hospital Vienna Lainz, Vienna, Austria); S. Walford, J. Sinclair, S. Hughes, V. McLelland, J. Ward (New Cross Hospital, Wolverhampton, UK); G. Roglic, Z. Metelko, Z. R. Pepeonik (Vuk Vrhovac Institute for Diabetes, Zagreb, Croatia)

### **Steering Committee members**

J. H. Fuller (London), B. Karamanos, Chairman (Athens), A.-K. Sjolie (Odense), N. Chaturvedi (London), M. Toeller (Duesseldorf), G. Pozza, Co-chairman (Milan), B. Ferriss (Cork), M. Porta (Turin), R. Rottiers (Gent), G. Michel (Luxembourg)

### **Co-ordinating Centre**

J. H. Fuller, N. Chaturvedi, J. Holloway, D. Webb, L. Asbury, University College London, London, UK

### **Central laboratories**

G.-C. Viberti, R. Swaminathan, P. Lumb, A. Collins, S. Sankaralingham, M. A. Crook, Guy's and St Thomas Hospital, London, UK

### **Retinopathy Grading Centre**

S. Aldington, T. Mortemore, H. Lipinski, Royal Postgraduate Medical School of Imperial College London, London, UK

### **The Pittsburgh Epidemiology of Diabetes Complications Study**

D. Becker, D. Ellis, T. Costacou, R. Miller

### **The FinnDiane study**

We thank all the physicians and nurses participating in the collection of patients.

The centres are: Central Finland Central Hospital; Central Hospital of Kanta-Hame; Central Hospital of Kymenlaakso; Central Hospital of Lansi-Pohja; Central Ostrobothnian Hospital District; City of Vantaa Health Center; Helsinki University Central Hospital; Iisalmi Hospital; Kainuu Central Hospital; Kerava Health Center; Kouvola Health Center; Kuopio University Hospital; Kuusamo Health Center; Kuusankoski Hospital; Lapland Central Hospital; Länsi-Uusimaa Hospital, Tammisaari; Mikkeli Central Hospital; North Karelian

Hospital; Paijat-Hame Central Hospital; Palokka-Vaajakoski Health Center; Pori City Hospital; Riihimäki Hospital; Salo Hospital; Satakunta Central Hospital; Savonlinna Central Hospital; Seinajoki Central Hospital; South Karelia Hospital District; Tampere University Hospital; Turku Health Center; Turku University Central Hospital; and Vasa Central Hospital.

**The Coronary Artery Calcification in Type 1 Diabetes study**

J. E. Hokanson, R. H. Eckel, S. Garg, J. Ehrlich, G. L. Kinney
